# Supplementary material
Source: publisher figshare collection journal article supplement (https://tandf.figshare.com/ndownloader/files/40898862)
Supplement: Supplementary file 1 [file 40898862]

**Figure S1.** HPLC chromatograms of methanol and water extracts of *Astragalus tokatensis*, *Helichrysum noeanum* and *Stachys huber-morathii*. ATME: Methanol extract of *A. tokatensis*; ATWE: Water extract of *A. tokatensis*; HNME: Methanol extract of *H. noeanum*; HNWE: Water extract of *H. noeanum*; SHME: Methanol extract of *S. huber-morathii*; SHWE: Water extract of *S. huber-morathii*.
